# Supplementary material for: Robust SNP-based prediction of rheumatoid arthritis through machine-learning-optimized polygenic risk score
Source: Springer Nature journal article supplement (doi:10.1186/s12967-023-03939-5), 2023-02-07
Supplement: MOESM2 [file 24001990]

**Table S1. Summary of studies that have used of genetics in the prediction of RA**

| Study                                                                                                                                                                                                                                      | Samples                                                                                                                                                                                                            | Prediction Model                                                                                                                                          | Prediction Performances    |
|--------------------------------------------------------------------------------------------------------------------------------------------------------------------------------------------------------------------------------------------|--------------------------------------------------------------------------------------------------------------------------------------------------------------------------------------------------------------------|-----------------------------------------------------------------------------------------------------------------------------------------------------------|----------------------------|
| <b>Karlson, E. W. et al.</b> Cumulative Association of Twenty-Two Genetic Variants with Seropositive Rheumatoid Arthritis Risk. <i>Ann Rheum Dis</i> 69, 1077–1085 (2010).                                                                 | 289 Caucasian seropositive cases and 481 controls from the US Nurses' Health Studies (NHS)<br>629 Caucasian CCP antibody positive cases and 623 controls from the Swedish Epidemiologic Investigation of RA (EIRA) | Weighted Genetic Risk Score (wGRS) (14 SNPs and 8 HLA alleles) with Clinical Risk Factors                                                                 | <b>AUCs:</b> 0.66 - 0.75   |
| <b>Kurreeman, F. et al.</b> Genetic Basis of Autoantibody Positive and Negative Rheumatoid Arthritis Risk in a Multi-ethnic Cohort Derived from Electronic Health Records. <i>The American Journal of Human Genetics</i> 88, 57–69 (2011). | 1515 Electronic Health Record (EHR) derived RA cases and 1480 controls<br>5539 autoantibody-positive RA cases and 20169 controls from GWAS                                                                         | 29 RA Risk alleles (SNPs)                                                                                                                                 | <b>AUCs:</b> 0.63 - 0.74   |
| <b>Chibnik, L. B. et al.</b> Genetic Risk Score Predicting Risk of Rheumatoid Arthritis Phenotypes and Age of Symptom Onset. <i>PLOS ONE</i> 6, e24380 (2011).                                                                             | 542 Caucasian RA cases and 551 Caucasian controls from Nurses' Health Study and Nurses' Health Study II                                                                                                            | wGRS (31 SNPs and 8 HLA alleles)                                                                                                                          | <b>AUCs:</b> 0.563 - 0.712 |
| <b>Scott, I. C. et al.</b> Predicting the Risk of Rheumatoid Arthritis and Its Age of Onset through Modelling Genetic Risk Variants with Smoking. <i>PLOS Genetics</i> 9, e1003808 (2013).                                                 | Wellcome Trust Case Control Consortium (WTCCC: 1516 cases; 1647 controls);<br>UK RA Genetics Group Consortium (UKRAGG: 2623 cases; 1500 controls)                                                                  | 25 HLA alleles, 31 SNPs, Ever-smoking status                                                                                                              | <b>AUCs:</b> 0.617 - 0.857 |
| <b>Sparks, J. A. et al.</b> Improved performance of epidemiologic and genetic risk models for rheumatoid arthritis serologic phenotypes using family history. <i>Annals of the Rheumatic Diseases</i> 74, 1522–1529 (2015).                | Nurses' Health Study (NHS, 381 RA cases and 410 controls)<br>Epidemiological Investigation of RA (EIRA, 1244 RA cases and 971 controls)                                                                            | Family history, Epidemiologic Risk factors, and Genetic Risk Score (8 HLA alleles and 31 SNPs)                                                            | <b>AUCs:</b> 0.74 - 0.83   |
| <b>Yarwood, A. et al.</b> A weighted genetic risk score using all known susceptibility variants to estimate rheumatoid arthritis risk. <i>Annals of the Rheumatic Diseases</i> 74, 170–176 (2015).                                         | 11366 RA cases and 15489 healthy controls from UK, USA, Sweden, The Netherlands and Spain                                                                                                                          | wGRS (45 SNPs), imputed amino acids at HLA loci, and gender                                                                                               | <b>AUC:</b> 0.67 - 0.78    |
| <b>Rostami, S. et al.</b> Comparison of methods to construct a genetic risk score for prediction of rheumatoid arthritis in the population-based Nord-Trøndelag Health Study, Norway. <i>Rheumatology</i> 59, 1743–1751 (2020).            | Nord-Trøndelag Health (HUNT) Study (489 cases; 61584 controls)                                                                                                                                                     | wGRS (27 SNPs)                                                                                                                                            | <b>AUC:</b> 0.78           |
| <b>Yu, X.-H. et al.</b> Systematic Evaluation of Rheumatoid Arthritis Risk by Integrating Lifestyle Factors and Genetic Risk Scores. <i>Frontiers in Immunology</i> 13, (2022).                                                            | UK Biobank Data (3537 cases; 278286 controls)                                                                                                                                                                      | 81 SNPs and Clinical characteristics (Age, sex, genotyped batch, Townsend deprivation index, smoking status, physical activity, drinking status, and BMI) | <b>AUCs:</b> 0.658 - 0.688 |

**Table S2. Detailed information of the 13 selected SNPs and their genes from feature selection**

| # | SNP ID       | ID   | CHROM | POS       | REF | ALT | Gene         | Mean Feature Importance Score | Feature Importance Ranking | Univariate Logistic Regression |                  |                       |          | Localised Region | Predicted Function (pFSNP)? | pFSNP/LD Details                                                                                                       | GWAS Associations (10E-5) |          |                 |         |                                     | Gene Details                                                                                                                                                                                |                                                                                                                                                                                                                                                                                                                                                                                                                                                                                          |                                                                                                                             |                     |                                                                                                                                                                                                                                                                  |                                            |
|---|--------------|------|-------|-----------|-----|-----|--------------|-------------------------------|----------------------------|--------------------------------|------------------|-----------------------|----------|------------------|-----------------------------|------------------------------------------------------------------------------------------------------------------------|---------------------------|----------|-----------------|---------|-------------------------------------|---------------------------------------------------------------------------------------------------------------------------------------------------------------------------------------------|------------------------------------------------------------------------------------------------------------------------------------------------------------------------------------------------------------------------------------------------------------------------------------------------------------------------------------------------------------------------------------------------------------------------------------------------------------------------------------------|-----------------------------------------------------------------------------------------------------------------------------|---------------------|------------------------------------------------------------------------------------------------------------------------------------------------------------------------------------------------------------------------------------------------------------------|--------------------------------------------|
|   |              |      |       |           |     |     |              |                               |                            | Odds Ratio                     | 95% CI           | $\beta$ (Effect size) | P-value  |                  |                             |                                                                                                                        | Metabolism                | Immunity | Gene Expression | Disease | Endocrine System                    | Cellular Function                                                                                                                                                                           | Full Gene Name                                                                                                                                                                                                                                                                                                                                                                                                                                                                           | Gene Function                                                                                                               | Pathways (Concised) | Pathway Source                                                                                                                                                                                                                                                   | PubMed Publications (Gene Relevance to RA) |
| 1 | rs1266832853 | SNP1 | 1     | 248722788 | G   | T   | OR2T29;OR2T5 | 0.0612                        | 1                          | 33.19                          | (23.7, 46.49)    | 3.502                 | 2.57E-92 | Exonic           | ✓                           | <ul style="list-style-type: none"> <li>Non-Synonymous</li> <li>A &gt; D</li> <li>Tolerated - Low Confidence</li> </ul> |                           |          |                 |         |                                     | Olfactory Receptor Family 2 Subfamily T Member 29; Olfactory Receptor Family 2 Subfamily T Member 5                                                                                         | <ul style="list-style-type: none"> <li>Odorant receptor</li> </ul>                                                                                                                                                                                                                                                                                                                                                                                                                       | <ul style="list-style-type: none"> <li>Signal transduction</li> <li>Olfactory transduction</li> </ul>                       | Reactome            |                                                                                                                                                                                                                                                                  |                                            |
| 2 | rs200901373  | SNP2 | 2     | 130872956 | G   | T   | POTEF        | 0.0501                        | 2                          | 81.49                          | (47.68, 139.3)   | 4.400                 | 3.07E-58 | Intronic         |                             |                                                                                                                        |                           |          |                 |         | POTE Ankyrin Domain Family Member F | <ul style="list-style-type: none"> <li>Created from the insertion of a beta-actin fragment at the C-terminus in the POTEE paralog gene</li> <li>New functional chimeric protein.</li> </ul> |                                                                                                                                                                                                                                                                                                                                                                                                                                                                                          |                                                                                                                             |                     |                                                                                                                                                                                                                                                                  |                                            |
| 3 | rs60465633   | SNP3 | 1     | 16918473  | G   | A   | NBPF1        | 0.0486                        | 3                          | 1448                           | (202.4, 10360)   | 7.278                 | 4.20E-13 | Exonic           | ✓                           | <ul style="list-style-type: none"> <li>Non-Synonymous</li> <li>T &gt; M</li> <li>Tolerated - Low Confidence</li> </ul> |                           |          |                 |         |                                     | NBPF Member 1                                                                                                                                                                               | <ul style="list-style-type: none"> <li>Encoded by one of the numerous copies of NBPF genes clustered in the p36, p12 and q21 region of the chromosome 1.</li> </ul>                                                                                                                                                                                                                                                                                                                      |                                                                                                                             |                     |                                                                                                                                                                                                                                                                  |                                            |
| 4 | rs142869031  | SNP4 | 15    | 43906035  | C   | G   | STRC         | 0.0456                        | 4                          | 0.0081                         | (0.0030, 0.0216) | -4.822                | 1.02E-21 | Intronic         |                             | <ul style="list-style-type: none"> <li>5 pFSNPs in LD</li> </ul>                                                       |                           |          |                 |         |                                     | Stereocilin                                                                                                                                                                                 | <ul style="list-style-type: none"> <li>Essential to the formation of horizontal top connectors between outer hair cell stereocilia</li> </ul>                                                                                                                                                                                                                                                                                                                                            | <ul style="list-style-type: none"> <li>Sensory Perception</li> </ul>                                                        | Reactome            |                                                                                                                                                                                                                                                                  |                                            |
| 5 | rs11385557   | SNP5 | 7     | 97944934  | A   | T   | BAIAP2L1     | 0.0365                        | 5                          | 0.0137                         | (0.0061, 0.0308) | -4.290                | 2.49E-25 | Intronic         |                             | <ul style="list-style-type: none"> <li>19 pFSNPs in LD</li> </ul>                                                      | ✓                         | ✓        | ✓               | ✓       |                                     | BAR/MD Domain Containing Adaptor Protein 2 Like 1                                                                                                                                           | <ul style="list-style-type: none"> <li>May function as adaptor protein</li> <li>Involved in the formation of clusters of actin bundles</li> <li>Plays a role in the reorganization of the actin cytoskeleton in response to bacterial infection</li> </ul>                                                                                                                                                                                                                               | <ul style="list-style-type: none"> <li>Signal transduction</li> </ul>                                                       | Reactome            | <p>Distinctive gene expression signatures in rheumatoid arthritis synovial tissue fibroblast cells: correlates with disease activity. Genes Immun. 2007 8:6, 480-491 (2007).</p> <p>Galligan, C. L., Balg, E., Bykerk, V., Keystone, E. C. &amp; Fish, E. N.</p> |                                            |
| 6 | rs143773270  | SNP6 | 10    | 18085101  | G   | A   | TMEM236      | 0.0328                        | 6                          | 0.0053                         | (0.0013, 0.0213) | -5.238                | 1.56E-13 | Exonic           | ✓                           | <ul style="list-style-type: none"> <li>Non-Synonymous</li> <li>G &gt; R</li> <li>Deleterious</li> </ul>                |                           |          |                 |         |                                     | Transmembrane Protein 236                                                                                                                                                                   | <ul style="list-style-type: none"> <li>Predicted to be integral component of membrane</li> </ul>                                                                                                                                                                                                                                                                                                                                                                                         |                                                                                                                             |                     |                                                                                                                                                                                                                                                                  |                                            |
| 7 | rs11246240   | SNP7 | 11    | 651491    | C   | G   | DEAF1        | 0.0268                        | 7                          | 0.1083                         | (0.0780, 0.1506) | -2.223                | 5.51E-40 | Intronic         | ✓                           | <ul style="list-style-type: none"> <li>eQTL</li> </ul>                                                                 |                           |          | ✓               |         |                                     | DEAF1 Transcription Factor                                                                                                                                                                  | <ul style="list-style-type: none"> <li>Transcription factor that binds to sequence with multiple copies of 5'-TTC[CG]G-3' present in its own promoter and that of the HNRPA2B1 gene.</li> <li>Down-regulates transcription of these genes.</li> <li>Activates the proenkephalin gene independently of promoter binding</li> <li>Inhibitor of cell proliferation, by arresting cells in the G0 or G1 phase.</li> <li>Required for neural tube closure and skeletal patterning.</li> </ul> | <ul style="list-style-type: none"> <li>SIDS Susceptibility Pathways</li> </ul>                                              | WikiPathways        |                                                                                                                                                                                                                                                                  |                                            |
| 8 | rs112667995  | SNP8 | 19    | 14675207  | A   | G   | TECR         | 0.0253                        | 8                          | 0.0503                         | (0.0308, 0.0820) | -2.990                | 4.52E-33 | Intronic         | ✓                           | <ul style="list-style-type: none"> <li>eQTL</li> </ul>                                                                 | ✓                         | ✓        |                 | ✓       |                                     | Trans-2,3-Enoyl-CoA Reductase                                                                                                                                                               | <ul style="list-style-type: none"> <li>Production of very long-chain fatty acids for sphingolipid synthesis</li> <li>Degradation of the sphingosine moiety in sphingolipids</li> <li>Catalyzes the last of the four reactions of the long-chain fatty acids elongation cycle</li> </ul>                                                                                                                                                                                                  | <ul style="list-style-type: none"> <li>Metabolism of Lipids</li> </ul>                                                      | Reactome            |                                                                                                                                                                                                                                                                  |                                            |
| 9 | rs79555231   | SNP9 | 6     | 162992348 | C   | T   | PRKN         | 0.0238                        | 9                          | 0.0825                         | (0.0567, 0.1200) | -2.495                | 7.55E-39 | Intronic         |                             | <ul style="list-style-type: none"> <li>21 pFSNPs in LD</li> </ul>                                                      |                           |          |                 |         |                                     | Parkin RBR E3 Ubiquitin Protein Ligase                                                                                                                                                      | <ul style="list-style-type: none"> <li>Promotes the autophagic degradation of dysfunctional depolarized mitochondria via the promotion of ubiquitination of mitochondrial proteins</li> </ul>                                                                                                                                                                                                                                                                                            | <ul style="list-style-type: none"> <li>Metabolism of Proteins</li> <li>Adaptive Immune System</li> <li>Mitophagy</li> </ul> | Reactome            | <p>Loss of Parkin reduces inflammatory arthritis by inhibiting p53 degradation. Redox Biol. 12, 666 (2017).</p> <p>Jung, V. Y. et al.</p>                                                                                                                        |                                            |

**Table S3. Potentially functional SNPs (pfSNPs) in linkage disequilibrium with selected SNPs without previously established potential function.**

| SNP         | LD SNPs    | Gene     | Localised Region | Coding Region Details           | Predicted Function                 | pfSNP Details                                                 | R2    |
|-------------|------------|----------|------------------|---------------------------------|------------------------------------|---------------------------------------------------------------|-------|
| rs142869031 | rs2614819  | STRC     | Intronic         |                                 | E                                  |                                                               | 0.935 |
|             | rs2614822  | STRC     | Intronic         |                                 | E                                  |                                                               | 0.935 |
|             | rs2729509  | STRC     | Exonic           | • F>C   F>S<br>• Non-Synonymous | S                                  | • FB_ESE_222 (+)                                              | 0.814 |
|             | rs3101443  | STRC     | Intergenic       |                                 | T/E                                | • cap (-)   GEN_INI (-)   AREB6 (+)                           | 0.952 |
|             | rs2614811  | STRC     | Intergenic       |                                 | T/E                                | • Nkx2-5 (+)   Opaque-2 (+)   Tst-1 (+)                       | 0.952 |
|             | rs13232181 | BAIAP2L1 | Intronic         |                                 | E                                  |                                                               | 0.997 |
|             | rs12673586 | BAIAP2L1 | Intronic         |                                 | E                                  |                                                               | 0.994 |
|             | rs6465666  | BAIAP2L1 | Intronic         |                                 | E                                  |                                                               | 0.994 |
|             | rs2394852  | BAIAP2L1 | Intronic         |                                 | E                                  |                                                               | 1.000 |
|             | rs7791321  | BAIAP2L1 | Intronic         |                                 | E                                  |                                                               | 0.997 |
|             | rs2107716  | BAIAP2L1 | Intronic         |                                 | I/E                                | • GY_DS_ISRE_78 (+)   GY_DS_ISRE_138 (-)   GY_DS_ISRE_145 (-) | 1.000 |
|             | rs10647784 | BAIAP2L1 | Intronic         |                                 | I                                  | • GY_DS_ISRE_58 (-)                                           | 0.986 |
|             | rs6963210  | BAIAP2L1 | Intronic         |                                 | I/E                                | • GY_DS_ISRE_20 (-)   GY_DS_ISRE_50 (-)   GY_DS_ISRE_89 (-)   | 1.000 |
|             | rs9648908  | BAIAP2L1 | Intronic         |                                 | I/E                                | • GY_DS_ISRE_68 (+)   GY_DS_ISRE_130 (-)                      | 1.000 |
| rs11385557  | rs7797943  | BAIAP2L1 | Intronic         |                                 | I/E                                | • GY_DS_ISRE_73 (-)                                           | 1.000 |
|             | rs3801264  | BAIAP2L1 | Intronic         |                                 | E                                  |                                                               | 1.000 |
|             | rs1468338  | BAIAP2L1 | Intronic         |                                 | E                                  |                                                               | 1.000 |
|             | rs2158553  | BAIAP2L1 | Intronic         |                                 | E                                  |                                                               | 1.000 |
|             | rs12112351 | BAIAP2L1 | Intronic         |                                 | E                                  |                                                               | 1.000 |
|             | rs10808107 | BAIAP2L1 | Intronic         |                                 | E                                  |                                                               | 1.000 |
|             | rs10953256 | BAIAP2L1 | Intronic         |                                 | E                                  |                                                               | 1.000 |
|             | rs2286074  | BAIAP2L1 | Intronic         |                                 | E                                  |                                                               | 1.000 |
|             | rs7458551  | BAIAP2L1 | Intronic         |                                 | E                                  |                                                               | 1.000 |
|             | rs10080731 | PRKN     | Intronic         |                                 | T                                  | • En-1 (-)   Msx-1 (-)                                        | 1.000 |
|             | rs10080795 | PRKN     | Intronic         |                                 | T                                  | • MEIS1B:HOXA9 (-)   Ubx (-)                                  | 1.000 |
|             | rs10080853 | PRKN     | Intronic         |                                 | T                                  | • GR (-)   MCM1+SFF (-)   AG (+)                              | 1.000 |
|             | rs11966654 | PRKN     | Intronic         |                                 | T                                  | • HMGIY (-)   Oct-4 (POU5F1) (-)   AIRE (+)   c-Rel (+)       | 1.000 |
|             | rs11967554 | PRKN     | Intronic         |                                 | T                                  | • MATalpha2 (+)   TGA1a (+)                                   | 1.000 |
| rs11968095  | PRKN       | Intronic |                  | T                               | • Opaque-2 (+)   Pax-6 (+)         | 1.000                                                         |       |
| rs11968987  | PRKN       | Intronic |                  | T                               | • OCT1 (-)   Pbx-1 (-)   HOXA4 (+) | 0.995                                                         |       |
| rs11969575  | PRKN       | Intronic |                  | T                               | • C/EBPgamma (-)                   | 0.998                                                         |       |
| rs35988208  | PRKN       | Intronic |                  | T                               | • GATA-2 (-)                       | 1.000                                                         |       |
| rs79555231  | rs4091546  | PRKN     | Intronic         |                                 | T                                  | • AREB6 (-)   HSF (-)                                         | 1.000 |
|             | rs6906849  | PRKN     | Intronic         |                                 | T                                  | • GR (-)                                                      | 1.000 |
|             | rs7450548  | PRKN     | Intronic         |                                 | T                                  | • cap (-)   IRF (-)                                           | 0.911 |
|             | rs7451147  | PRKN     | Intronic         |                                 | T                                  | • HSF (+)   Oct-4 (POU5F1) (+)                                | 1.000 |
|             | rs6929604  | PRKN     | Intronic         |                                 | P/I                                | • LIM1 (-)                                                    | 1.000 |
|             | rs9458598  | PRKN     | Intronic         |                                 | P                                  | • GY_DS_ISRE_68 (+)   GY_DS_ISRE_130 (-)                      | 0.907 |
|             | rs9458599  | PRKN     | Intronic         |                                 | P                                  | • AML1 (-)   AML1a (-)   core-binding factor (-)              | 1.000 |
|             | rs9458600  | PRKN     | Intronic         |                                 | P                                  | • FACB (-)   Ncx (+)   Tst-1 (+)                              | 1.000 |
|             | rs9458601  | PRKN     | Intronic         |                                 | P                                  | • Gfi1b (-)                                                   | 0.911 |
|             | rs9458602  | PRKN     | Intronic         |                                 | P                                  | • Crx (+)                                                     | 0.911 |
|             | rs9458603  | PRKN     | Intronic         |                                 | P                                  | • OCT1 (-)   POU3F2 (-)   v-Myb (+)                           | 1.000 |
|             | rs6934979  | PRKN     | Intronic         |                                 | P                                  | • MADS-A (-)   YY1 (-)   BR-C 22 (+)                          | 1.000 |
|             |            |          |                  |                                 | I                                  | • GY_DS_ISRE_40 (+)   GY_DS_ISRE_5 (-)                        | 1.000 |

| pf-Legend: |                                           |
|------------|-------------------------------------------|
| T          | Alter TF/miRNA binding site               |
| I          | ISRE                                      |
| P          | Alter Promoter site                       |
| E          | Alter Gene Expression (eQTL)              |
| S          | Exonic Splice Enhancer/Silencer (ESE/ESS) |

**Table S4. Previously identified GWAS associations of selected SNPs at p-value significance of  $1 \times 10^{-5}$  from BioBank Japan PheWeb, IEU Open GWAS Project, and GWAS Atlas.**

| #  | Database             | Assoc. Category  | Associations                                         | SNP rsID | rs11385557 | rs11246240 | rs112667995 |
|----|----------------------|------------------|------------------------------------------------------|----------|------------|------------|-------------|
|    |                      |                  |                                                      | Gene     | BAIAP2L1   | DEAF1      | TECR        |
|    |                      |                  |                                                      | p-values |            |            |             |
| 1  | OpenGWAS             | Immunity         | Lymphocyte count                                     |          | 1.94E-05   |            |             |
| 2  | OpenGWAS             |                  | Lymphocyte percentage                                |          | 6.39E-12   |            |             |
| 3  | OpenGWAS             |                  | Lymphocyte percentage of white cells                 |          | 9.08E-05   |            |             |
| 4  | OpenGWAS             |                  | Monocyte count                                       |          | 1.78E-05   |            |             |
| 5  | OpenGWAS             |                  | Neutrophil count                                     |          | 5.32E-05   |            |             |
| 6  | OpenGWAS             |                  | Neutrophil percentage                                |          | 1.11E-08   |            |             |
| 7  | OpenGWAS             | Diseases         | L72 Follicular cysts of skin and subcutaneous tissue |          | 4.91E-05   |            |             |
| 8  | OpenGWAS             |                  | Other peripheral nerve disorders                     |          | 7.69E-05   |            |             |
| 9  | OpenGWAS             |                  | Prostate cancer                                      |          | 1.27E-11   |            |             |
| 10 | OpenGWAS             | Endocrine System | SHBG                                                 |          | 3.69E-26   |            |             |
| 11 | OpenGWAS             |                  | Testosterone                                         |          | 6.81E-09   |            |             |
| 12 | OpenGWAS             | Cell Function    | Kinesin-like protein KIF23                           |          |            |            | 7.41E-05    |
| 13 | Biobank Japan PheWeb | Metabolism       | Alkaline phosphatase                                 |          | 6.14E-07   |            |             |
| 14 | OpenGWAS             |                  | Low density lipoprotein cholesterol levels           |          | 1.20E-05   |            |             |
| 15 | OpenGWAS             |                  | Cystatin C                                           |          |            |            | 8.47E-06    |
| 16 | OpenGWAS             |                  | Urate                                                |          | 2.48E-06   |            |             |
| 17 | OpenGWAS             | Gene Expression  | eQTL-ANO9                                            |          |            | 1.56E-07   |             |
| 18 | OpenGWAS             |                  | eQTL-ASNS                                            |          | 4.63E-11   |            |             |
| 19 | OpenGWAS             |                  | eQTL-B4GALNT4                                        |          |            | 3.94E-05   |             |
| 20 | OpenGWAS             |                  | eQTL-BRI3                                            |          | 2.87E-11   |            |             |
| 21 | OpenGWAS             |                  | eQTL-CLEC17A                                         |          |            |            | 1.01E-05    |
| 22 | OpenGWAS             |                  | eQTL-DEAF1                                           |          |            | 5.93E-11   |             |
| 23 | OpenGWAS             |                  | eQTL-DNAJB1                                          |          |            |            | 9.47E-07    |
| 24 | OpenGWAS             |                  | eQTL-DRD4                                            |          |            | 1.99E-14   |             |
| 25 | OpenGWAS             |                  | eQTL-EPS8L2                                          |          |            | 2.85E-06   |             |
| 26 | OpenGWAS             |                  | eQTL-GIPC1                                           |          |            |            | 4.23E-05    |
| 27 | OpenGWAS             |                  | eQTL-HRAS                                            |          |            | 2.01E-08   |             |
| 28 | OpenGWAS             |                  | eQTL-LRRC56                                          |          |            | 6.35E-36   |             |
| 29 | OpenGWAS             |                  | eQTL-PHRF1                                           |          |            | 3.98E-06   |             |
| 30 | OpenGWAS             |                  | eQTL-PIDD1                                           |          |            | 1.10E-08   |             |
| 31 | OpenGWAS             |                  | eQTL-RNH1                                            |          |            | 7.01E-10   |             |
| 32 | OpenGWAS             | eQTL-TECR        |                                                      |          |            | 2.70E-05   |             |

**Table S5.** Predictive performance of Polygenic Risk Scores (PRS) calculated from the 13 selected SNPs in a 5-fold cross-validation of the Training dataset and in each of the 3 unseen Test datasets.

|                                  |                                 | Machine Learning Models |             |               |         |         |
|----------------------------------|---------------------------------|-------------------------|-------------|---------------|---------|---------|
| Dataset                          | Evaluation Metric               | Logistic Regression     | Naïve Bayes | Random Forest | XGBoost | SVM RBF |
| Training set<br>Cross-validation | Mean AUC                        | 0.992                   | 0.992       | 0.992         | 0.992   | 0.982   |
|                                  | Mean Sensitivity                | 0.967                   | 0.965       | 0.970         | 0.972   | 0.972   |
|                                  | Mean Specificity                | 0.964                   | 0.964       | 0.961         | 0.960   | 0.962   |
|                                  | Mean Accuracy                   | 0.965                   | 0.965       | 0.966         | 0.966   | 0.967   |
|                                  | Mean Average Precision (PR-AUC) | 0.980                   | 0.980       | 0.976         | 0.972   | 0.968   |

|                     |                   | Machine Learning Models |             |               |         |         |
|---------------------|-------------------|-------------------------|-------------|---------------|---------|---------|
| Dataset             | Evaluation Metric | Logistic Regression     | Naïve Bayes | Random Forest | XGBoost | SVM RBF |
| Test1<br>Evaluation | AUC               | 0.994                   | 0.994       | 0.993         | 0.992   | 0.990   |
|                     | Sensitivity       | 0.992                   | 0.992       | 0.976         | 0.976   | 0.992   |
|                     | Specificity       | 0.963                   | 0.963       | 0.954         | 0.957   | 0.960   |
|                     | F1 Score          | 0.947                   | 0.947       | 0.928         | 0.931   | 0.943   |
|                     | Accuracy          | 0.977                   | 0.977       | 0.965         | 0.967   | 0.976   |
|                     | Avg. Precision    | 0.977                   | 0.977       | 0.973         | 0.972   | 0.970   |
| Test2<br>Evaluation | AUC               | 0.988                   | 0.988       | 0.986         | 0.989   | 0.978   |
|                     | Sensitivity       | 0.945                   | 0.945       | 0.969         | 0.969   | 0.969   |
|                     | Specificity       | 0.961                   | 0.961       | 0.963         | 0.963   | 0.961   |
|                     | F1 Score          | 0.920                   | 0.920       | 0.935         | 0.935   | 0.932   |
|                     | Accuracy          | 0.953                   | 0.953       | 0.966         | 0.966   | 0.965   |
|                     | Avg. Precision    | 0.962                   | 0.962       | 0.962         | 0.966   | 0.955   |
| Test3<br>Evaluation | AUC               | 0.984                   | 0.984       | 0.980         | 0.983   | 0.983   |
|                     | Sensitivity       | 0.961                   | 0.961       | 0.976         | 0.976   | 0.969   |
|                     | Specificity       | 0.966                   | 0.966       | 0.963         | 0.966   | 0.966   |
|                     | F1 Score          | 0.935                   | 0.935       | 0.939         | 0.943   | 0.939   |
|                     | Accuracy          | 0.963                   | 0.963       | 0.970         | 0.971   | 0.967   |
|                     | Avg. Precision    | 0.959                   | 0.959       | 0.949         | 0.955   | 0.953   |
